# Supplementary material
Source: publisher figshare collection journal article supplement (https://gsajournals.figshare.com/ndownloader/files/26602823)
Supplement: Supplementary file 1 [file 26602823]

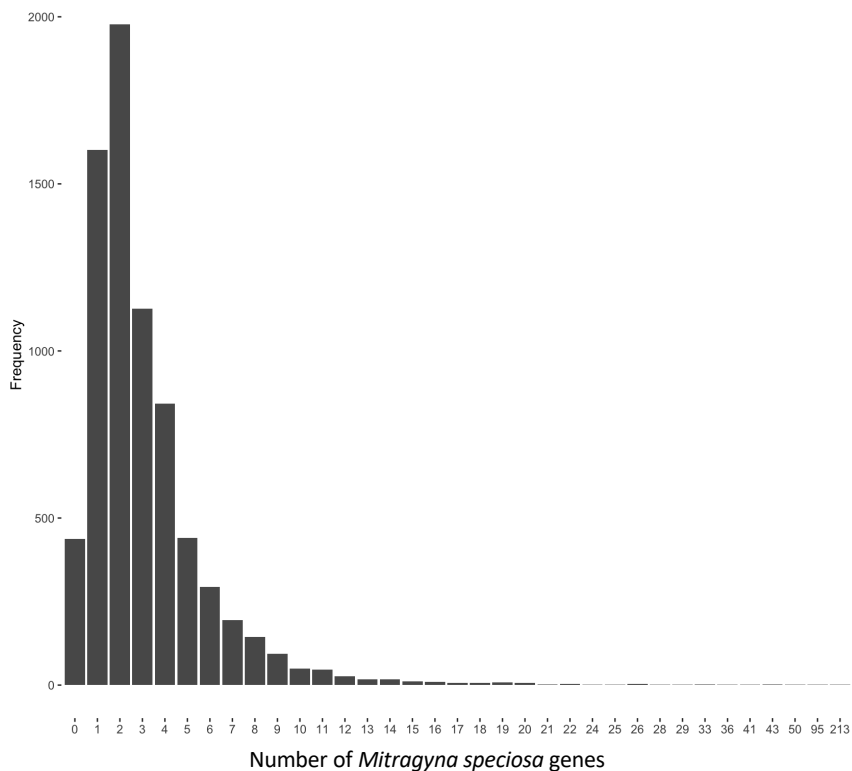

**Figure S2. Frequency of gene counts in orthogroups between Rubiaceae species.** Orthogroups were separated based on the number of *Mitragyna speciosa* genes that were present in groups containing a single *Coffea canephora* gene to examine gene duplications. Frequency is the number of orthogroups identified by Orthofinder (v2.2.7; Emms and Kelly 2019). The x-axis shows all possible numbers of *Mitragyna speciosa* genes present and the y-axis indicates the number of orthogroups.
